# Supplementary material for: Transesophageal Echocardiography in Ischemic Stroke With Atrial Fibrillation
Source: PubMed Central journal article supplement — J Am Heart Assoc. 2021 Nov 6;10(22):e022242. doi: 10.1161/JAHA.121.022242 (PMC8751927; doi:10.1161/jaha.121.022242), 2021-11-06
Supplement: JAH3-10-e022242-s001.pdf [file JAH3-10-e022242-s001.pdf]

# **SUPPLEMENTAL MATERIAL**

**Participating investigators and institutions**

| <b>Investigator</b>                                                        | <b>Institution</b>                              |
|----------------------------------------------------------------------------|-------------------------------------------------|
| Hee-Joon Bae, MD; Beom Joon Kim, MD;<br>Moon-Ku Han, MD; Jihoon Kang, MD   | Seoul National University Bundang<br>Hospital   |
| Jun Lee, MD                                                                | Yeungnam University Medical Center              |
| Jee-Hyun Kwon, MD; Wook-Joo Kim, MD                                        | Ulsan University Hospital                       |
| Jae-Kwan Cha, MD; Dae-Hyun Kim, MD;<br>Hyun-Wook Nah, MD                   | Dong-A University Hospital                      |
| Jay Chol Choi, MD                                                          | Jeju National University Hospital               |
| Joon-Tae Kim, MD; Ki-Hyun Cho, MD; Man-<br>Seok Park, MD; Kang-Ho Choi, MD | Chonnam National University Hospital            |
| Sung-Il Sohn, MD; Jeong-Ho Hong, MD                                        | Keimyung University Dongsan Medical<br>Center   |
| Soo Joo Lee, MD; Jae Guk Kim, MD                                           | Eulji University Hospital                       |
| Dong-Ick Shin, MD; Min-Ju Yeo, MD                                          | Chungbuk National University Hospital           |
| Tai Hwan Park, MD; Sang-Soon Park, MD                                      | Seoul Medical Center                            |
| Byung-Chul Lee, MD; Mi-Sun Oh, MD;<br>Kyung-Ho Yu, MD                      | Hallym University Sacred Heart Hospital         |
| Kyung Bok Lee, MD                                                          | Soon Chun Hyang University Hospital<br>Seoul    |
| Keun-Sik Hong, MD; Yong-Jin Cho, MD                                        | Inje University Ilsan Paik Hospital             |
| Dong-Eog Kim, MD; Wi-Sun Ryu, MD                                           | Dongguk University Ilsan Hospital               |
| Jong-Moo Park, MD; Kyusik Kang, MD                                         | Eulji General Hospital                          |
| Kenichi Todo, MD                                                           | Osaka University Graduate School of<br>Medicine |
| Yoshiki Yagita, MD; Kazumi Kimura, MD                                      | Kawasaki Medical School                         |
| Ryo Itabashi, MD                                                           | Kohnan Hospital                                 |
| Tadashi Terasaki, MD                                                       | Japanese Red Cross Kumamoto Hospital            |
| Yoshiaki Shiokawa, MD                                                      | Kyorin University School of Medicine            |

|                                       |                                                |
|---------------------------------------|------------------------------------------------|
| Kenji Kamiyama, MD                    | Nakamura Memorial Hospital                     |
| Shunya Takizawa, MD                   | Tokai University School of Medicine            |
| Satoshi Okuda, MD                     | NHO Nagoya Medical Center                      |
| Yasushi Okada, MD                     | NHO Kyushu Medical Center                      |
| Tomoaki Kameda, MD; Kazuomi Kario, MD | Jichi Medical University School of<br>Medicine |
| Yoshinari Nagakane, MD                | Kyoto Second Red Cross Hospital                |
| Yasuhiro Hasegawa, MD                 | St. Marianna University School of<br>Medicine  |
| Satoshi Shibuya, MD                   | South Miyagi Medical Center                    |
| Yasuhiro Ito, MD                      | TOYOTA Memorial Hospital                       |
| Hideki Matsuoka, MD                   | NHO Kagoshima Medical Center                   |
| Kazuhiro Takamatsu, MD                | Brain Attack Center Ota Memorial<br>Hospital   |
| Kazutoshi Nishiyama, MD               | Kitasato University School of Medicine         |
| Kazunori Toyoda, MD                   | National Cerebral and Cardiovascular<br>Center |

**Table S1. Data in patients with TEE and those with TTE alone (n=4251)**

|                                          | <b>Patients with TEE<br/>(n=679)</b> | <b>Patients with TTE<br/>alone (n=3572)</b> | <b><i>p</i><br/>value</b> | <b>Missing data,<br/>n (%)</b> |
|------------------------------------------|--------------------------------------|---------------------------------------------|---------------------------|--------------------------------|
| CRCS-K (South Korea), No. (%)            | 428 (63.0)                           | 2747 (76.9)                                 | <0.01                     | 0 (0.00)                       |
| Age, median (IQR), years                 | 73 (67–79)                           | 76 (69–82)                                  | <0.01                     | 0 (0.00)                       |
| Women, No. (%)                           | 264 (38.9)                           | 1723 (48.2)                                 | <0.01                     | 0 (0.00)                       |
| Body weight, median (IQR), kg            | 60.1 (52.8–68)                       | 60 (50.3–68)                                | 0.08                      | 30 (0.71)                      |
| Smoking, No. (%)                         | 268 (39.5)                           | 1057 (29.6)                                 | <0.01                     | 4 (0.09)                       |
| NVAF known prior to index event, No. (%) | 365 (53.8)                           | 1903 (53.3)                                 | 0.83                      | 0 (0.00)                       |
| Congestive heart failure, No. (%)        | 73 (10.8)                            | 330 (9.2)                                   | 0.22                      | 0 (0.00)                       |
| <b>Vascular risk factor, No. (%)</b>     |                                      |                                             |                           |                                |
| Hypertension                             | 491 (72.2)                           | 2621 (73.4)                                 | 0.57                      | 2 (0.05)                       |
| Diabetes mellitus                        | 189 (27.8)                           | 945 (26.5)                                  | 0.47                      | 2 (0.05)                       |
| Hyperlipidemia                           | 216 (31.8)                           | 1129 (31.7)                                 | 0.92                      | 5 (0.12)                       |
| <b>Past clinical history, No. (%)</b>    |                                      |                                             |                           |                                |
| Stroke prior to index event              | 143 (21.1)                           | 868 (24.3)                                  | 0.06                      | 3 (0.07)                       |
| Coronary heart disease                   | 85 (12.5)                            | 472 (13.2)                                  | 0.66                      | 0 (0.00)                       |
| Prestroke oral anticoagulants, No. (%)   | 158 (23.3)                           | 703 (19.7)                                  | 0.03                      | 3 (0.07)                       |
| Prestroke antiplatelets, No. (%)         | 227 (33.4)                           | 1330 (37.3)                                 | 0.06                      | 3 (0.07)                       |
| Ischemic stroke as index event, No. (%)  | 632 (93.2)                           | 3479 (97.5)                                 | <0.01                     | 4 (0.09)                       |
| Baseline NIHSS score, median (IQR)       | 4 (2–11)                             | 8 (3–16)                                    | <0.01                     | 0 (0.00)                       |
| <b>Laboratory data, median (IQR)</b>     |                                      |                                             |                           |                                |
| White blood cell count, / $\mu$ L        | 7100 (5750–8750)                     | 7500 (6030–9500)                            | <0.01                     | 1 (0.02)                       |
| Hemoglobin, g/dL                         | 13.8 (12.5–14.9)                     | 13.5 (12.1–14.7)                            | <0.01                     | 2 (0.05)                       |
| Platelet count, $\times 10^3/\mu$ L      | 191 (158–230)                        | 195 (160–237)                               | 0.13                      | 3 (0.07)                       |
| Glucose, mg/dL                           | 121 (105–152)                        | 124 (105–153)                               | 0.67                      | 14 (0.33)                      |
| PT-INR                                   | 1.03 (0.97–1.15)                     | 1.06 (1–1.15)                               | <0.01                     | 22 (0.52)                      |
| Renal dysfunction, No. (%) *             | 53 (7.9)                             | 414 (11.7)                                  | <0.01                     | 36 (0.85)                      |

\* Renal dysfunction was defined as creatinine clearance <30 mL/min.

CRCS-K, Clinical Research Collaboration for Stroke in Korea; IQR, interquartile range; mRS, modified Rankin Scale; NIHSS, National Institutes of Health Stroke Scale; NVAF, non-valvular atrial fibrillation; PT-INR, prothrombin time/international normalized ratio; TEE, transesophageal echocardiography; and TTE, transthoracic echocardiography.

**Table S2. Logistic regression models for intracardiac thrombus detection in patients who underwent TEE (n=679)**

|                                 | Univariate       |                | Multivariable (Model 1)* |                | Multivariable (Model 2)† |                |
|---------------------------------|------------------|----------------|--------------------------|----------------|--------------------------|----------------|
|                                 | OR (95% CI)      | <i>p</i> value | OR (95% CI)              | <i>p</i> value | OR (95% CI)              | <i>p</i> value |
| TTE                             | 1.79 (0.63–5.11) | 0.27           | 2.04 (0.69–5.97)         | 0.19           | 1.98 (0.69–5.74)         | 0.20           |
| Age (per 10-year increase)      | 1.12 (0.83–1.49) | 0.45           | 1.03 (0.76–1.39)         | 0.84           | --                       | --             |
| Women                           | 1.45 (0.82–2.54) | 0.19           | 1.49 (0.81–2.71)         | 0.19           | --                       | --             |
| NVAF known prior to index event | 2.85 (1.49–5.43) | <0.01          | --                       | --             | 2.16 (1.05–4.44)         | 0.03           |
| Congestive heart failure        | 2.71 (1.35–5.43) | <0.01          | 2.51 (1.19–5.28)         | 0.01           | 2.18 (1.06–4.49)         | 0.03           |
| Hypertension                    | 0.66 (0.37–1.19) | 0.16           | 0.52 (0.28–0.99)         | 0.04           | --                       | --             |
| Diabetes mellitus               | 0.83 (0.43–1.59) | 0.57           | 0.84 (0.43–1.66)         | 0.62           | --                       | --             |
| Stroke prior to index event     | 1.38 (0.73–2.62) | 0.32           | 1.11 (0.54–2.27)         | 0.77           | --                       | --             |
| Coronary heart disease          | 0.88 (0.37–2.13) | 0.78           | 0.86 (0.35–2.13)         | 0.74           | --                       | --             |
| Prestroke oral anticoagulants   | 2.34 (1.31–4.19) | <0.01          | 2.38 (1.22–4.62)         | 0.01           | 1.51 (0.79–2.91)         | 0.21           |
| Ischemic stroke as index event  | 0.67 (0.25–1.78) | 0.42           | --                       | --             |                          |                |

\* Model 1: adjusted for TTE plus prespecified variables of age, sex, congestive heart failure, hypertension, diabetes mellitus, stroke prior to index event, coronary heart disease, and prestroke oral anticoagulants. The model showed a c-statistic of 0.68 and a Hosmer-Lemeshow chi-squared statistic of 6.25 ( $p=0.61$ ). Number of observations=679; log likelihood ratio chi-squared test statistic=20.90 ( $p=0.01$ ); and McFadden's  $R^2=0.06$ .

† Model 2: adjusted for TTE plus those variables showing  $P<0.05$  on univariate models. The model showed a c-statistic of 0.66 and a Hosmer-Lemeshow chi-squared statistic of 0.22 ( $p=0.89$ ). Number of observations=679; log likelihood ratio chi-squared test statistic=19.10 ( $p<0.01$ ); and McFadden's  $R^2=0.05$ .

CI, confidence interval; CRCS-K, Clinical Research Collaboration for Stroke in Korea; NVAF, non-valvular atrial fibrillation; OR, odds ratio; SAMURAI-NVAF, Stroke Acute Management with Urgent Risk-Factor Assessment and Improvement-NonValvular Atrial Fibrillation; TEE, transesophageal echocardiography; and TTE, transthoracic echocardiography.
